# Supplementary material for: Deep eutectic solvents as a new class of draw agent to enrich low abundance DNA and proteins using forward osmosis
Source: Royal Society of Chemistry journal article supplement (doi:10.1039/c5ra20735e), 2015-01-01
Supplement: c5ra20735e1.pdf [file c5ra20735e1.pdf]

## Electronic Supporting Information (ESI):

### Deep eutectic solvents as new class of draw agent to enrich low abundant DNA and proteins using forward osmosis

Dibyendu Mondal, Ashesh Mahto, Poliseti Veera Babu, Jitkumar Bhatt, Kamalesh Prasad \* and Sanna Kotrapanavar Nataraj\*

**Table S1:** Flux and rejection data of different feed solutions using IPA treated TFC membrane under nano filtration mode at 6 bar applied pressure.

| Feed solution     | Concentration (ppm) | Flux (LMH) | % Rejection |
|-------------------|---------------------|------------|-------------|
| MgSO <sub>4</sub> | 1180                | 6.5±0.5    | 92          |
| NaCl              | 3410                | 5.0±0.5    | 86          |
| RB5               | 20                  | 7.0±0.5    | 100         |
| BSA               | 200                 | 7.5±0.5    | 100         |

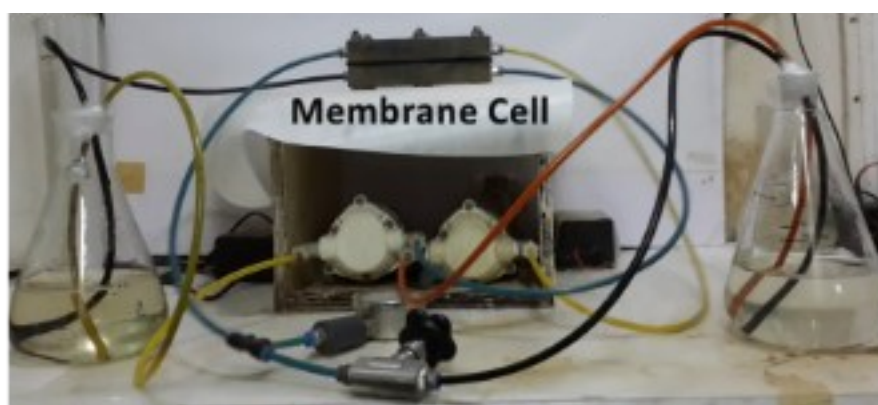

**Figure S1.** Photograph showing bench-scale experimental set-up used in this study.

**Table S2.** Raw data of DNA concentration profile analyzed using UV-Vis spectrometer.

| Time (hrs) | Abs  | Conc (ppm) |
|------------|------|------------|
| 0.00       | 1.00 | 500.00     |
| 2.00       | 1.24 | 624.75     |
| 4.00       | 1.44 | 723.90     |
| 6.00       | 1.69 | 848.39     |
| 8.00       | 2.04 | 1024.60    |
| 10.00      | 2.39 | 1200.30    |
| 12.00      | 2.82 | 1415.66    |
| 14.00      | 3.55 | 1780.62    |

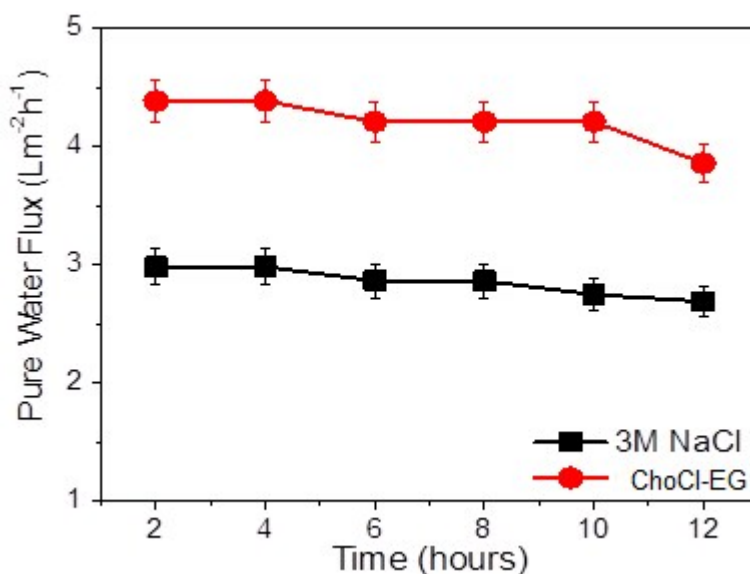

**Figure S2** Comparison of flux using 3M NaCl and DES as Draw Solution for protein enrichment.

**Table S3.** Comparative table for pure water specific flux (LMH/bar) of different membrane from literature used in FO process

| Membrane        | Thickness ( $\mu\text{m}$ ) | Pure Water Flux (LMH/bar) | Reference                      |
|-----------------|-----------------------------|---------------------------|--------------------------------|
| Double layer CA | 35                          | 0.17                      | J. Membr. Sci. 360 (2010) 522. |
| Single layer CA | 34                          | 0.13                      | J. Membr. Sci. 360 (2010) 522. |
| HTI Membrane CA | <50                         | 1.13                      | Desalination 197 (2006) 1.     |
| TFC Membrane    | -                           | 2.56                      | J. Membr. Sci. 335 (2009) 103. |
| CA Membrane     | ~250                        | 0.72                      | J. Membr. Sci. 335 (2009) 103. |
| HTI Membrane    | -                           | 0.67                      | J. Membr. Sci. 343 (2009) 42.  |
| CA Hollow Fiber | -                           | 1.8-5.0                   | J. Membr. Sci. 355 (2010) 36.  |
| TFC polyamide   | ~140                        | ~4.0                      | Present Study                  |
